# Supplementary material for: Methylation silencing CDH23 is a poor prognostic marker in diffuse large B-cell lymphoma
Source: publisher site journal article supplement (doi:10.18632/aging.203268), 2021-07-12
Supplement: Supplementary file [file aging-v13i13-203268-supplementary-material-SD1.pdf]

**SUPPLEMENTARY FIGURES**

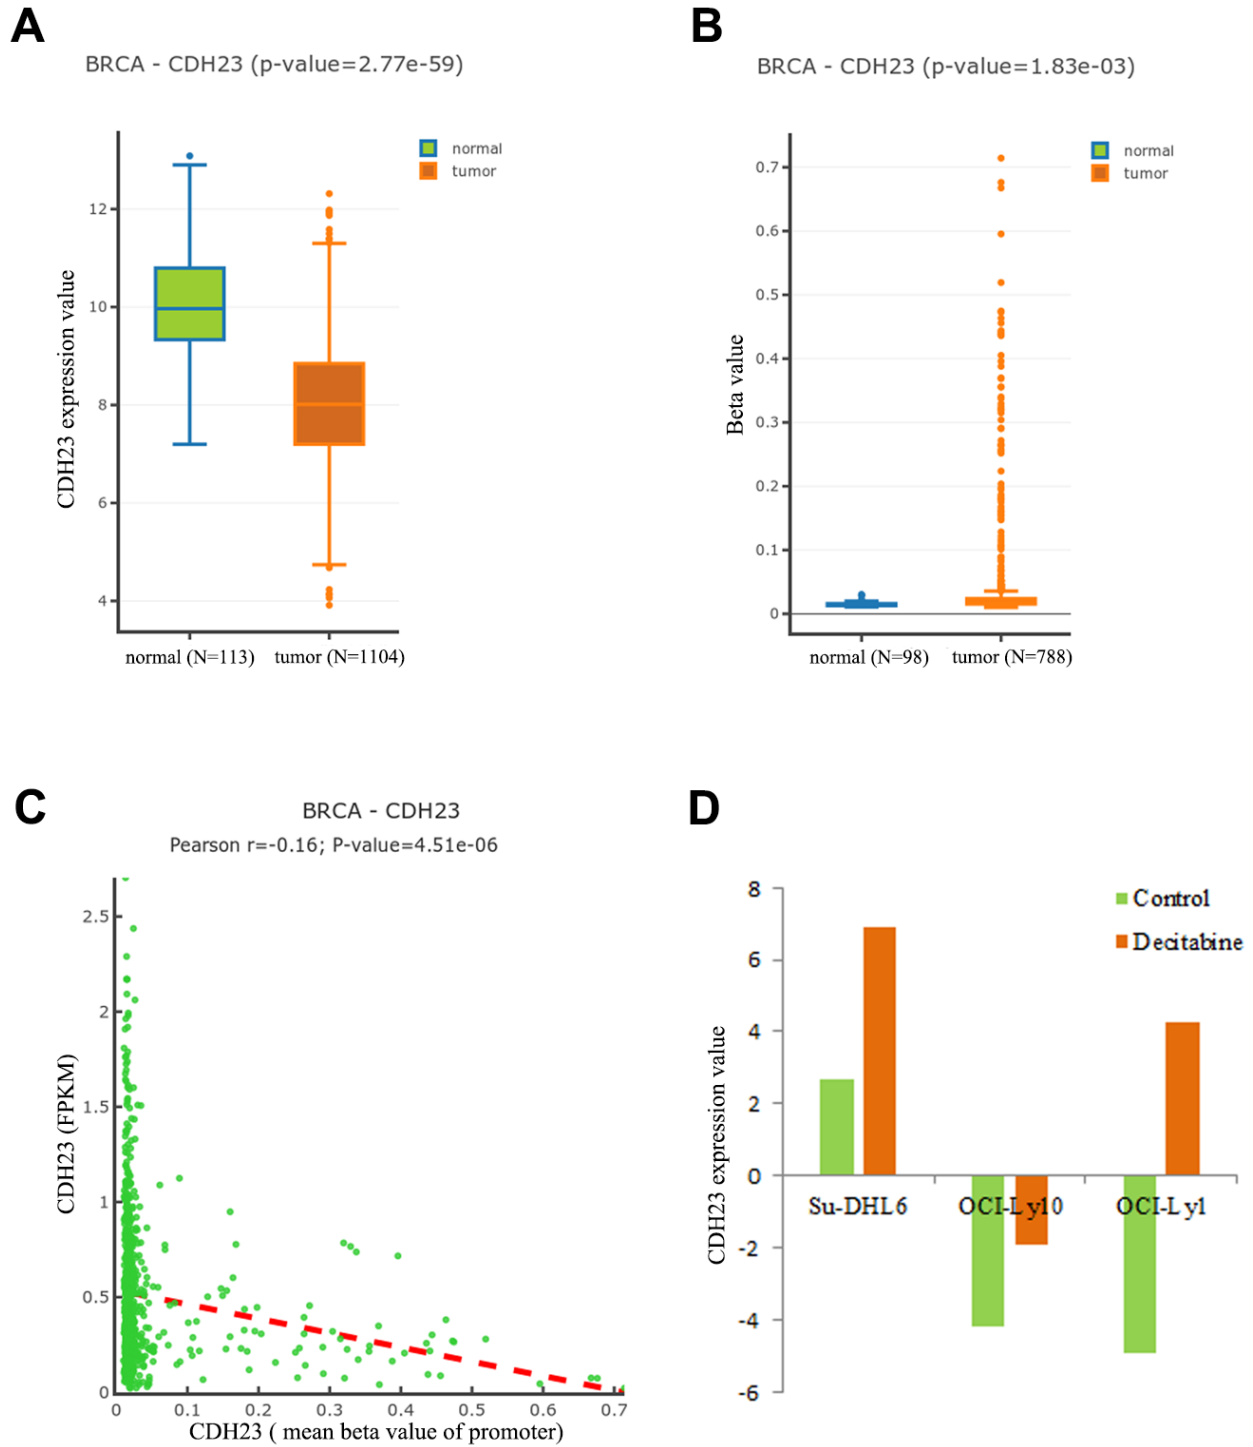

**Supplementary Figure 1. The verification of epigenetic regulation of CDH23.** (A) The expression level of CDH23 in BRCA tissues and normal tissues (DNMIVD). (B) The methylation value of *CDH23* in BRCA tissues and normal tissues (DNMIVD). (C) The correlation of CDH23 expression and promoter methylation value in BRCA (DNMIVD). (D) The expression level of CDH23 with or without the treatment of demethylating agent decitabine in DLBCL cell lines, including Su-DHL6, OCI-Ly10 and OCI-Ly1 (GEO).

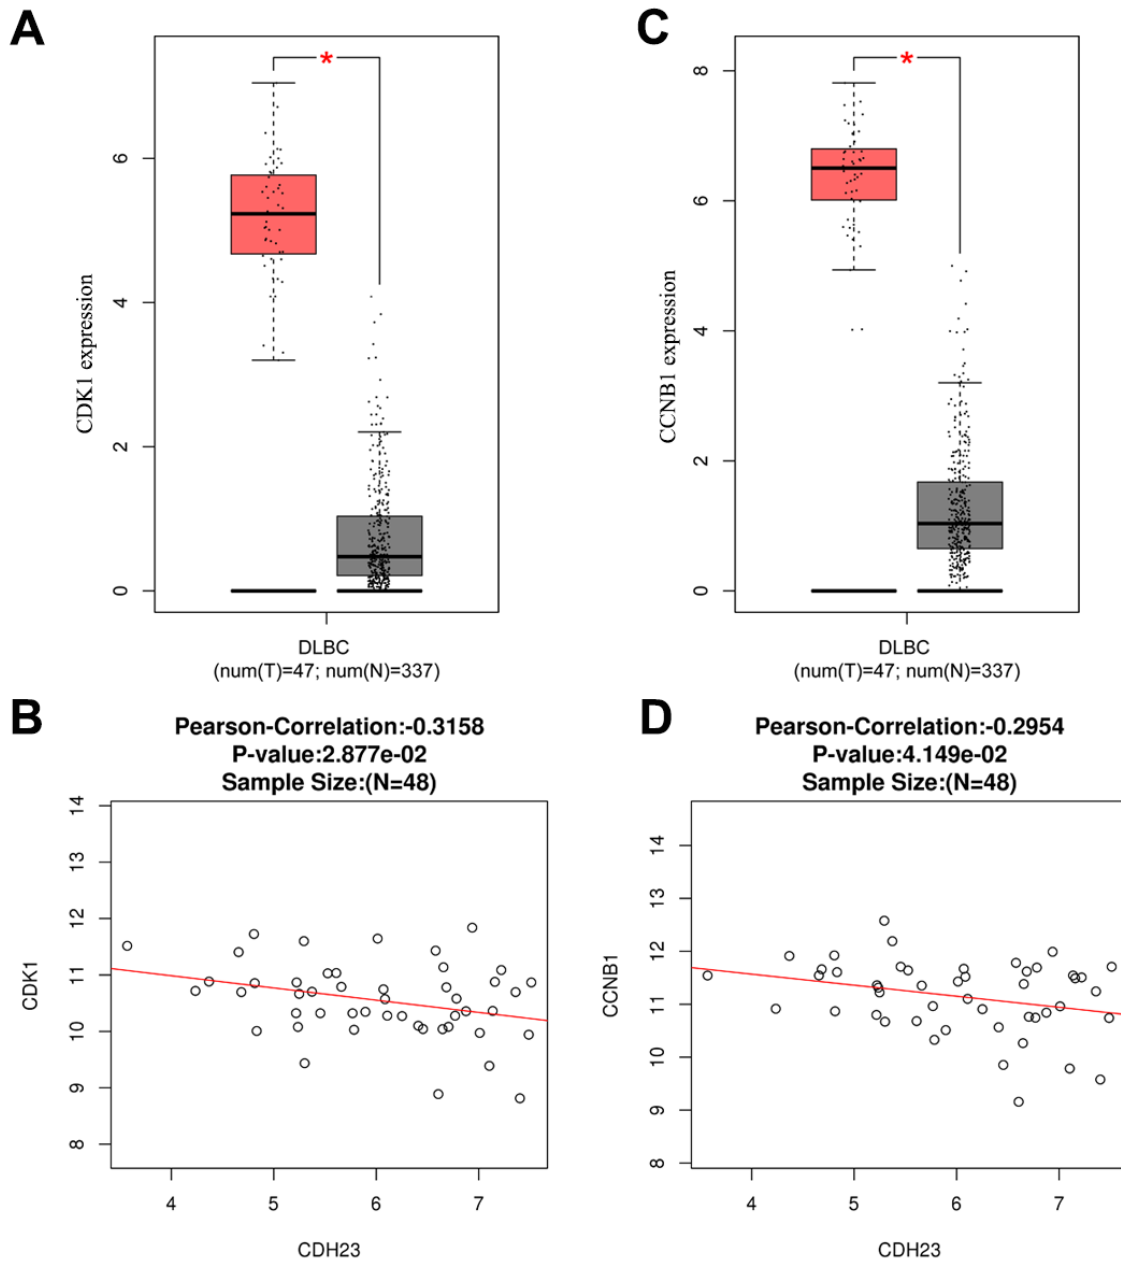

**Supplementary Figure 2. The expression level of CDK1 and CCNB1, and the correlation between their expression level with CDH23 in DLBCL.** (A) The expression level of CDK1 in DLBCL tissues and normal tissues (GEPIA). (B) The correlation of CDK1 expression level and CDH23 expression level (LinkedOmics). (C) The expression value of CCNB1 in DLBCL tissues and normal tissues (GEPIA). (D) The correlation of CCNB1 expression level and CDH23 expression level (LinkedOmics).
